# Supplementary material for: Metal–organic framework-derived hierarchical porous N/Co-doped carbon-supported sponge-like Pd–SnO2 nanostructures for low-temperature CO oxidation
Source: Royal Society of Chemistry journal article supplement (doi:10.1039/d3ma00819c), 2024-01-01
Supplement: d3ma00819c1.pdf [file d3ma00819c1.pdf]

Supplementary Information

Metal-organic Framework-derived Hierarchical Porous N-doped Carbon Supported Sponge-like Pd-SnO<sub>2</sub> Nanostructures for Low-temperature CO Oxidation

Adewale K. Ipadeola<sup>a,b</sup>, Ahmed Gamal<sup>a,b,c</sup>, Belal Salah<sup>a,b</sup>, Yassmin Ibrahim<sup>a,b</sup>, Aboubakr M. Abdullah<sup>a\*</sup>, Aderemi B. Haruna<sup>c</sup>, Kenneth I. Ozoemena<sup>c</sup> and Kamel Eid<sup>b\*</sup>

<sup>a</sup>Center for Advanced Materials, Qatar University, Doha 2713, Qatar.

<sup>b</sup>Gas Processing Center(GPC), College of Engineering, Qatar University, Doha 2713, Qatar.

<sup>c</sup>Molecular Science Institute, School of Chemistry, University of the Witwatersrand, Private Bag 3, PO Wits, Johannesburg, South Africa

\*Corresponding authors: bakr@qu.edu.qa; kenneth.ozoemena@wits.ac.za; kamel.eid@qu.edu.qa

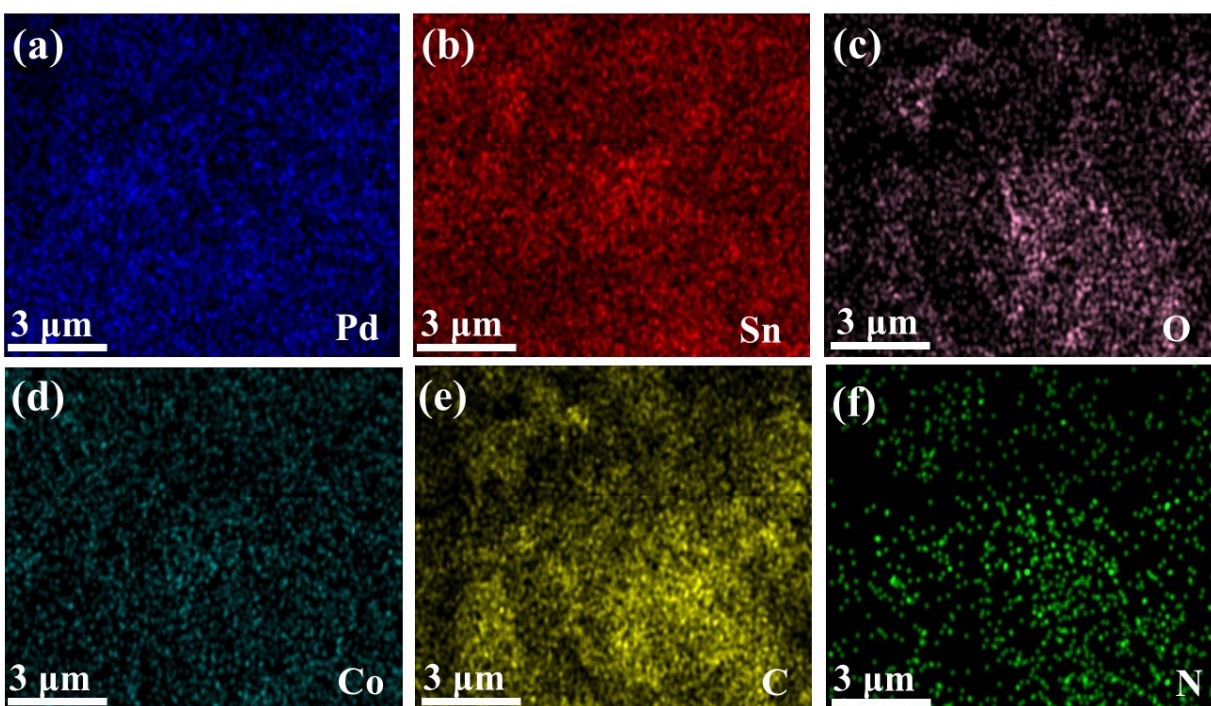

Fig. S1. Elemental mapping (a) Pd, (b) Sn, (c) O, (d) Co, (e) C and (f) N of Pd-SnO<sub>2</sub>/MOF-PNC

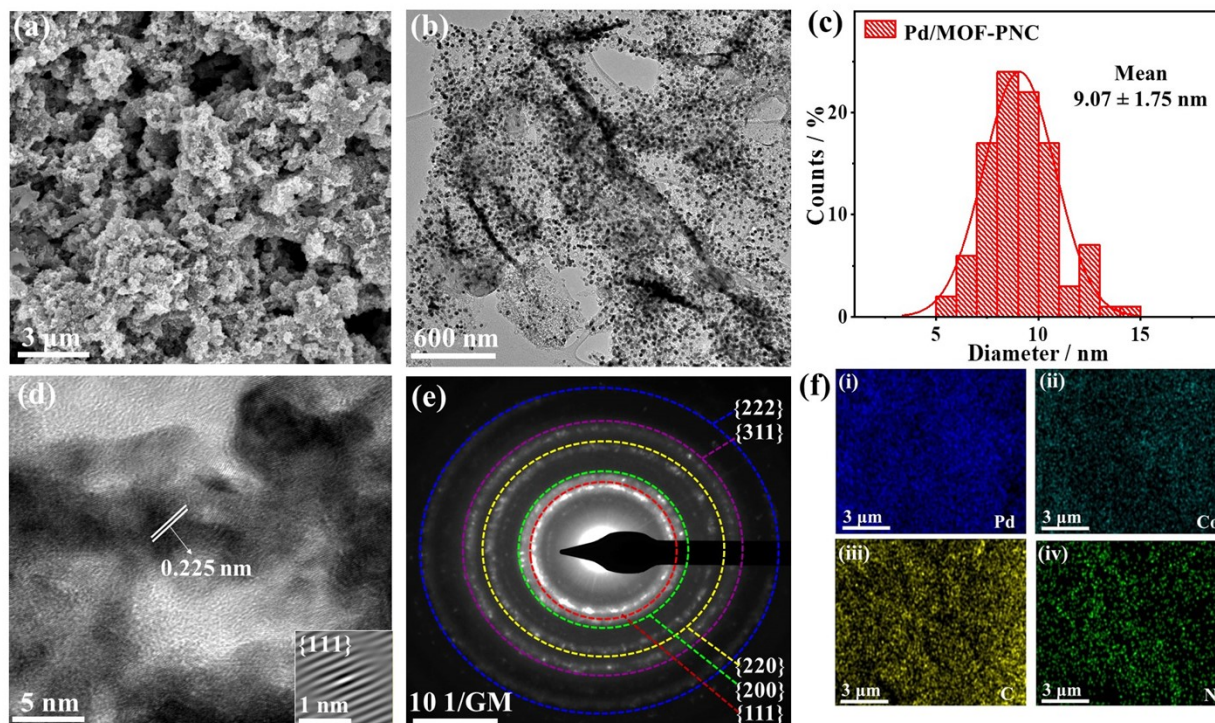

**Fig. S2.** (a) SEM, (b) TEM, (c) Nanoparticles size distribution, (d) HRTEM, (e) SAED, and (f) Elemental mapping (i) Pd, (ii) Co, (iii) C and (iv) N of Pd-of Pd/MOF-PNC.

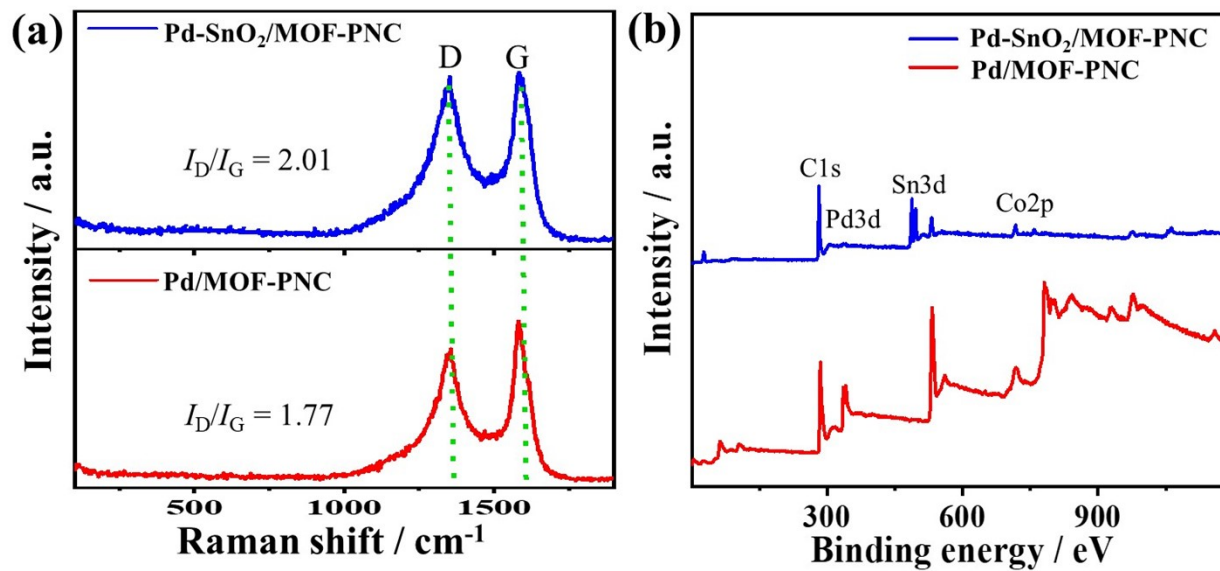

**Fig. S3.** (a) Raman spectra and XPS wide scans of Pd-SnO<sub>2</sub>/MOF-PNC and Pd/MOF-PNC

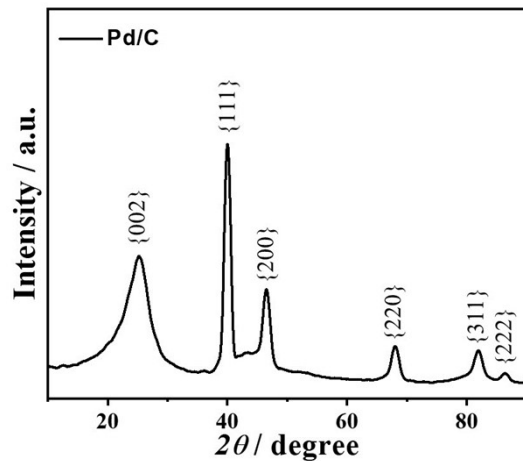

Fig. S4. XRD of Pd/C taken from the JCPDS database

Table S1. XPS and EDX atomic contents of elements in Pd-SnO<sub>2</sub>/MOF-PNC and Pd/MOF-PNC

|    | XPS                          |            | EDX                          |            | ICP-OES                      |            |            |
|----|------------------------------|------------|------------------------------|------------|------------------------------|------------|------------|
|    | Pd-SnO <sub>2</sub> /MOF-PNC | Pd/MOF-PNC | Pd-SnO <sub>2</sub> /MOF-PNC | Pd/MOF-PNC | Pd-SnO <sub>2</sub> /MOF-PNC | Pd/MOF-PNC | Pd/C       |
| Pd | 2.16 At.%                    | 2.71 At.%  | 2.31 At.%                    | 2.12 At.%  | 15.90 wt.%                   | 17.70 wt.% | 19.78 wt.% |
| Sn | 3.57 At.%                    | -          | 1.31 At.%                    | -          | 18.12 wt.%                   | -          | -          |
| Co | 4.50 At.%                    | 15.88 At.% | 2.52 At.%                    | 5.29 At.%  | 3.16 wt.%                    | 11.24 wt.% | -          |
| C  | 78.86 At.%                   | 80.97 At.% | 66.21 At.%                   | 49.81 At.% | -                            | -          | -          |
| O  | 10.42 At.%                   | -          | 11.93 At.%                   | 23.24 At.% | -                            | -          | -          |
| N  | 0.39 At.%                    | 0.44 At.%  | 15.72 At.%                   | 20.54 At.% | -                            | -          | -          |

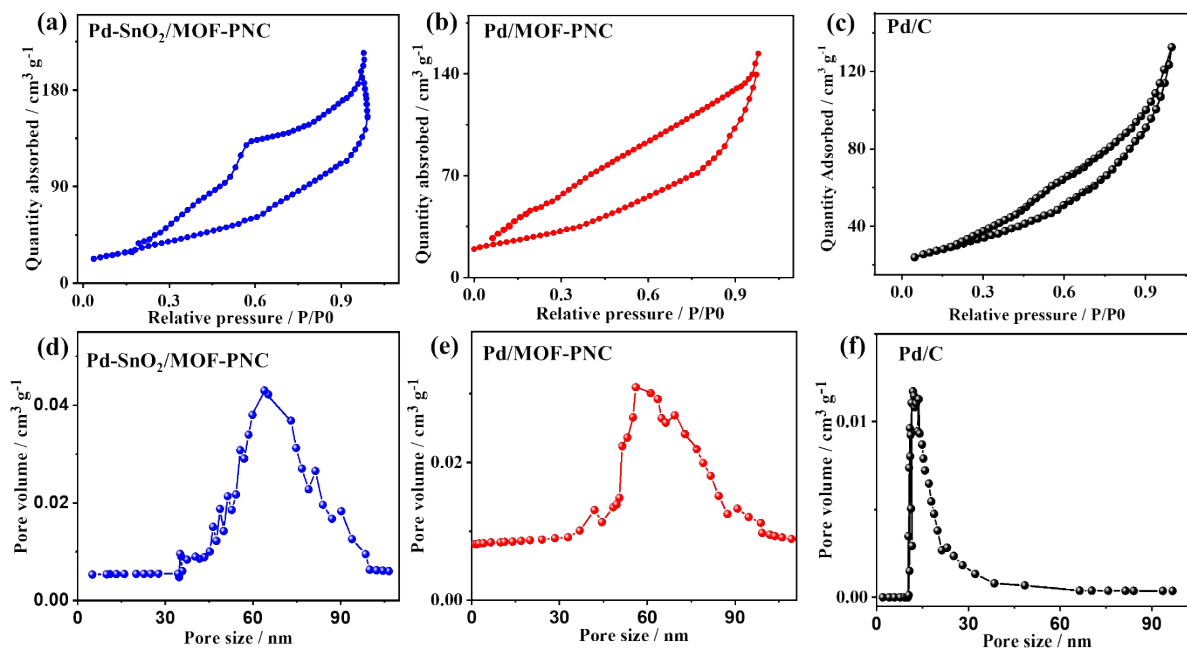

Fig. S5. (a-c) N<sub>2</sub>-adsorption/desorption isotherm and (d-e) pore size distribution of Pd-SnO<sub>2</sub>/MOF-PNC, Pd/MOF-PNC, and Pd/C.

Table S2: Binding energies of Pd 3d spectra of Pd-SnO<sub>2</sub>/MOF-PNC and Pd/MOF-PNC catalysts

| Catalysts                    | Pd 3d <sub>5/2</sub> |                  |                  | Pd 3d <sub>3/2</sub> |                  |                  |
|------------------------------|----------------------|------------------|------------------|----------------------|------------------|------------------|
|                              | Pd <sup>0</sup>      | Pd <sup>2+</sup> | Pd <sup>4+</sup> | Pd <sup>0</sup>      | Pd <sup>2+</sup> | Pd <sup>4+</sup> |
| Pd-SnO <sub>2</sub> /MOF-PNC | 335.42               | 336.25           | 337.92           | 341.25               | 342.75           | 343.86           |
| Pd/MOF-PNC                   | 335.34               | 336.09           | 337.58           | 340.95               | 341.82           | 343.61           |

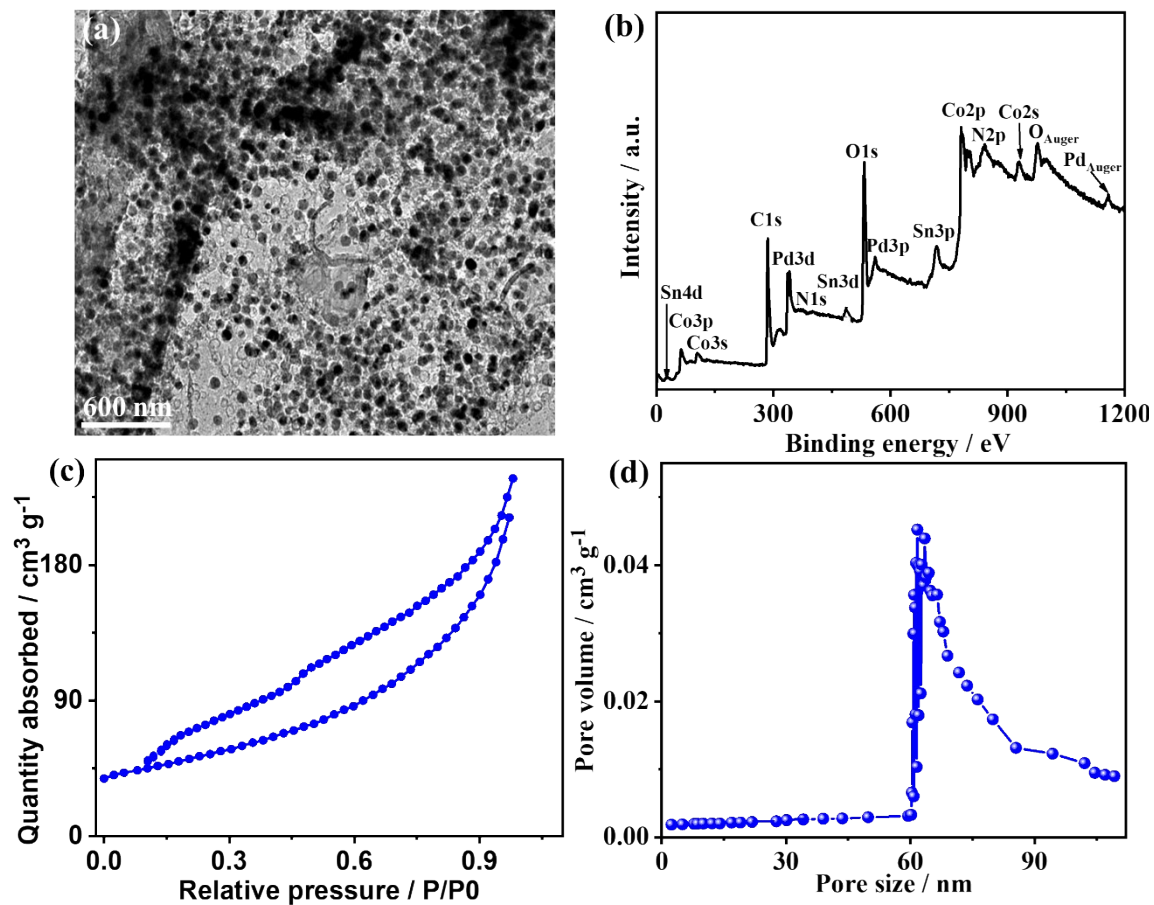

Fig. S6. High-resolution XPS (a) Pd3d and (b) Sn3d, (c) N<sub>2</sub>-adsorption/desorption isotherm and (d) pore size distribution of Pd-SnO<sub>2</sub>/MOF-PNC after the stability test for 108 h.

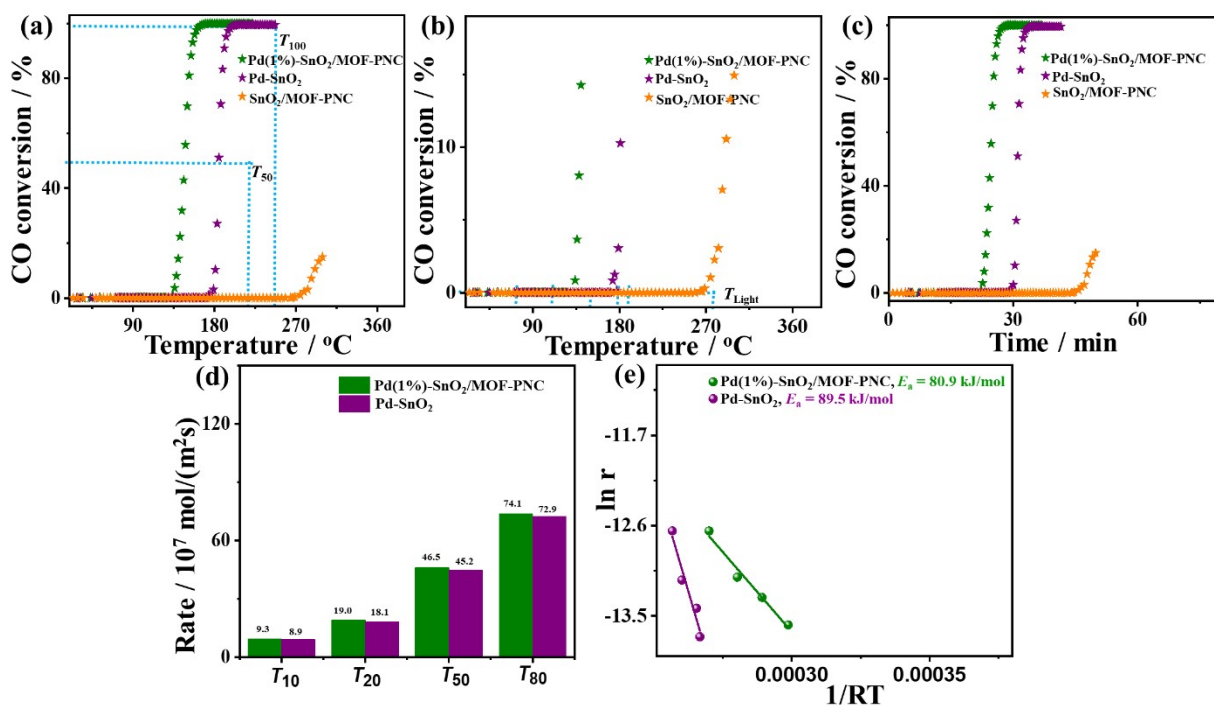

**Fig. S7.** (a,b) Temperature-dependent CO conversion, (c) Time-dependent CO conversion, (d) Rate at different CO conversion temperatures, and (e) Arrhenius plots of Pd(1%)-SnO<sub>2</sub>/MOF-PNC, Pd-SnO<sub>2</sub>, and SnO<sub>2</sub>/MOF-PNC.

Table S3. Comparative thermal CO oxidation performance of Pd-based catalysts.

MOF-derived porous N-doped carbon (MOF-PNC), high-entropy fluorite oxide (HEFO), hexagonal boron nitride (h-BN), calcination at 500 °C for 18 h (PC3), hydrothermal-like (HT), SSZ-13 zeolites (SSZ-13), rod-like (R)

| Catalysts                                                | Preparation methods                                           | Morphology             | T <sub>100</sub> (°C) | Refs      |
|----------------------------------------------------------|---------------------------------------------------------------|------------------------|-----------------------|-----------|
| Pd-SnO <sub>2</sub> /MOF-PNC                             | Microwave-irradiation/annealing/etching/microwave-irradiation | Spongy-like            | 65.6                  | This work |
| Pd/MOF-PNC                                               | Microwave-irradiation/annealing/etching/microwave-irradiation | Spongy-like            | 107.9                 | This work |
| Pd/CeSn75-800                                            | Counter precipitation/calcination                             | Core-shell             | ~ 100                 | 1         |
| Pd@SiO <sub>2</sub> /TiO <sub>2</sub> -500               | Precipitation/ calcination                                    | Core-shell             | ~ 400                 | 2         |
| CeO <sub>2</sub> -Pd/S-800-5h                            | Impregnation/ calcination                                     | 2d hexagonal mesopores | ~ 75                  | 3         |
| Pd <sub>1</sub> @HEFO                                    | Ball milling/ annealing/etching                               | Cubic                  | 170                   | 4         |
| Pd@CeO <sub>2</sub>                                      |                                                               |                        | 253                   |           |
| Pd/MgO(5)-h-BN                                           | Impregnation/calcination                                      | Nanosheets             | 140                   | 5         |
| Ce <sub>1-x</sub> Pd <sub>x</sub> O <sub>2-δ</sub> (PC3) | hydrothermal/reduction/calcination                            | Nanocrystals           | ~ 95                  | 6         |
| Pd/MgAl-HT                                               | Deposition-precipitation                                      | Nanocrystals           | ~ 90                  | 7         |
| Pd-1%P                                                   | Wet-impregnation/ calcination                                 | Fiber-like lamellar    | ~ 270                 | 8         |

|                                                                                                                                                                                                                                       |                                                                       |                                          |                                               |    |
|---------------------------------------------------------------------------------------------------------------------------------------------------------------------------------------------------------------------------------------|-----------------------------------------------------------------------|------------------------------------------|-----------------------------------------------|----|
| LaAlPd(0.8)O <sub>3</sub> -600                                                                                                                                                                                                        | Impregnation/<br>Calcination                                          | Perovskite                               | ~ 325                                         | 9  |
| Pd@SiO <sub>2</sub> -673                                                                                                                                                                                                              | Polymerization/calcination                                            | Core-shell                               | ~ 130                                         | 10 |
| Pd <sub>0.83</sub> Co <sub>0.17</sub> /C                                                                                                                                                                                              | Wet impregnation                                                      | Nanocrystals                             | 150                                           | 11 |
| Pd <sub>0.5</sub> /CeHfZrSnErO <sub>x</sub><br>Pd <sub>1.0</sub> /CeHfZrSnErO <sub>x</sub>                                                                                                                                            | Ultrasound-mediated<br>co-precipitation                               | Cubic                                    | 140<br>150                                    | 12 |
| Pd-SSZ-13                                                                                                                                                                                                                             | Ion exchange/ calcination                                             | Cubic particles                          | ~ 175                                         | 13 |
| PdO <sub>x</sub> /CeO <sub>2</sub>                                                                                                                                                                                                    | Radio frequency sputtering                                            | Dendrite-like                            | 250                                           | 14 |
| 4%Pd/R-CeO <sub>2</sub>                                                                                                                                                                                                               | Impregnation/ annealing                                               | Rod, cubic, and octahedral               | 50                                            | 15 |
| Pd-Cu/gC <sub>3</sub> N <sub>4</sub> NWs                                                                                                                                                                                              | Protonation/annealing                                                 | Nanowires                                | 149                                           | 16 |
| Pd/Cu/gC <sub>3</sub> N <sub>4</sub> NTs                                                                                                                                                                                              | Protonation/annealing                                                 | Nanotubes                                | 154                                           | 17 |
| Au/Pd/gC <sub>3</sub> N <sub>4</sub> NFs                                                                                                                                                                                              | Protonation/annealing                                                 | Nanofibers                               | 144                                           | 18 |
| Pd-impeded 3D<br>porous graphene (3D<br>Pd-E-PG)                                                                                                                                                                                      | Low-power microwave radiation                                         | 3D porous nanosheets                     | 190                                           | 19 |
| AuPd/TiO <sub>2</sub>                                                                                                                                                                                                                 | Incipient wetness method                                              | Nanospheres                              | 190                                           | 20 |
| Pd/Ni-MOF-HNC<br>Pd/Ni-MOF-NC                                                                                                                                                                                                         | Microwave-irradiation/<br>annealing/etching/microwave-<br>irradiation | Hollow nanosheets                        | 114.5<br>153.8                                | 21 |
| 5wt%Pd/Ce-MOF<br>7wt%Pd/Ce-MOF<br>3wt%Pd/Ce-MOF                                                                                                                                                                                       | Hydrothermal/microwave-<br>irradiation                                | Spherical Pd on needle<br>shaped support | 92<br>148<br>190                              | 22 |
| 2.9%Pd@MIL-101<br>4.9%Pd@MIL-101<br>2.2%Pd@MIL-101<br>1.1%Pd@MIL-101<br>0.6%Pd@MIL-101<br>0.3%Pd@MIL-101<br>0.1%Pd@MIL-101                                                                                                            | Hydrothermal/microwave-<br>irradiation                                | Spherical Ps on nanocubes<br>support     | 107<br>147<br>123<br>151<br>151<br>140<br>181 | 23 |
| Pd <sub>n</sub> (1-Cys) <sub>m</sub> /CeO <sub>2</sub><br>Pd <sub>n</sub> (1-Cys) <sub>m</sub> /TiO <sub>2</sub><br>Pd <sub>n</sub> (1-Cys) <sub>m</sub> /Fe <sub>3</sub> O <sub>4</sub><br>Pd <sub>n</sub> (1-Cys) <sub>m</sub> /ZnO | Chemical reduction/impregnation                                       | Monodispersed spherical<br>nanoclusters  | 110<br>112<br>115<br>155                      | 24 |

## References

- O. A. Stonkus, A. V. Zadesenets, E. M. Slavinskaya, A. I. Stadnichenko, V. A. Svetlichnyi, Y. V. Shubin, S. V. Korenev and A. I. Boronin, *Catal. Commun.*, 2022, **172**, 106554.
- A. Takabayashi, F. Kishimoto, H. Tsuchiya, H. Mikami and K. Takanabe, *Nanoscale Adv.*, 2023, **5**, 1124-1132.
- P. R. Murthy, S. Munsif, J.-C. Zhang and W.-Z. Li, *Ind. Eng Chem. Res.*, 2021, **60**, 14424-14433.
- H. Xu, Z. Zhang, J. Liu, C.-L. Do-Thanh, H. Chen, S. Xu, Q. Lin, Y. Jiao, J. Wang and Y. Wang, *Nat. Commun.*, 2020, **11**, 3908.
- L. Li, X. Liu, H. He, N. Zhang, Z. Liu and G. Zhang, *Catal. Today*, 2019, **332**, 214-221.
- J. Ye, Y. Xia, D.-g. Cheng, F. Chen and X. Zhan, *Int. J. Hydrog. Energy*, 2019, **44**, 17985-17994.
- X. Lin, J. Zhou, Y. Fan, Y. Zhan, C. Chen, D. Li and L. Jiang, *Dalton Tran.*, 2018, **47**, 14938-14944.
- J. Dong, J. Wang, J. Wang, M. Yang, W. Li and M. Shen, *Catal. Sci. Technol.*, 2017, **7**, 5038-5048.
- Y. J. Kim, J. H. Lim, B. K. Cho, S. B. Hong, I.-S. Nam and J. W. Choung, *J. Catal.*, 2015, **330**, 71-83.
- Y. Xu, J. Ma, Y. Xu, L. Xu, L. Xu, H. Li and H. Li, *RSC Adv.*, 2013, **3**, 851-858.
- I. B. Aragão, F. R. Estrada, D. H. Barrett and C. B. Rodella, *Mol. Catal.*, 2022, **526**, 112377.

12. F. Okejiri, J. Fan, Z. Huang, K. M. Siniard, M. Chi, F. Polo-Garzon, Z. Yang and S. Dai, *Iscience*, 2022, **25**, 104214.
13. D. Chen, H. Lei, W. Xiong, Y. Li, X. Ji, J.-Y. Yang, B. Peng, M. Fu, P. Chen and D. Ye, *ACS Catal.*, 2021, **11**, 13891-13901.
14. L. S. Kibis, A. A. Simanenko, A. I. Stadnichenko, V. I. Zaikovskii and A. I. Boronin, *J. Phys. Chem. C*, 2021, **125**, 20845-20854.
15. X. Zhang, W. Li, Z. Zhou, K. Chen, M. Wu and L. Yuan, *Mol. Catal.*, 2021, **508**, 111580.
16. K. Eid, Y. H. Ahmad, A. T. Mohamed, A. G. Elsafy and S. Y. Al-Qaradawi, *Catalysts*, 2018, **8**, 411.
17. K. Eid, M. H. Sliem, K. Jlassi, A. S. Eldesoky, G. G. Abdo, S. Y. Al-Qaradawi, M. A. Sharaf, A. M. Abdullah and A. A. Elzatahry, *Inorg. Chem. Commun.*, 2019, **107**, 107460.
18. K. Eid, M. H. Sliem, A. S. Eldesoky, H. Al-Kandari and A. M. Abdullah, *Int. J. Hydrog. Energy*, 2019, **44**, 17943-17953.
19. R. Kumar, J.-H. Oh, H.-J. Kim, J.-H. Jung, C.-H. Jung, W. G. Hong, H.-J. Kim, J.-Y. Park and I.-K. Oh, *ACS Nano*, 2015, **9**, 7343-7351.
20. A. Teixeira-Neto, R. Gonçalves, C. Rodella, L. Rossi and E. Teixeira-Neto, *Catal. Sci. Technol.*, 2017, **7**, 1679-1689.
21. A. K. Ipadeola, A. Gamal, A. M. Abdullah, A. B. Haruna, K. I. Ozoemena and K. Eid, *Catal. Sci. Technol.*, 2023, **13**, 4873-4882. .
22. A. Lin, A. A. Ibrahim, P. Arab, H. M. El-Kaderi and M. S. El-Shall, *ACS Appl. Mater. Interfaces*, 2017, **9**, 17961-17968.
23. M. S. El-Shall, V. Abdelsayed, S. K. Abd El Rahman, H. M. Hassan, H. M. El-Kaderi and T. E. Reich, *J. Mater. Chem.*, 2009, **19**, 7625-7631.
24. M. Farrag, M. K. Das, M. Moody and M. Samy El-Shall, *ChemPhysChem*, 2021, **22**, 312-322.
